# Supplementary material
Source: PubMed Central journal article supplement (PMC5771534)
Supplement: Supp_Fig1.pdf [file Supp_Fig1.pdf]

## Supplementary Data

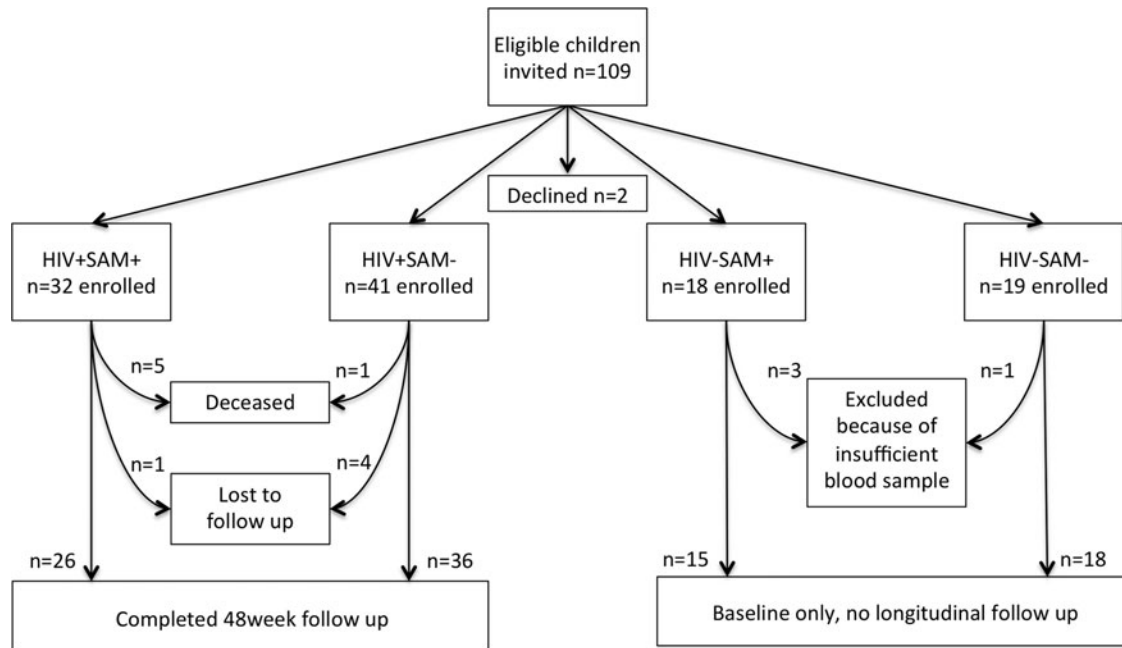

**SUPPLEMENTARY FIG. S1.** Flow chart showing number of participants at each stage of the study.
