# Supplementary material
Source: PubMed Central journal article supplement (PMC5771534)
Supplement: Supp_Fig2.pdf [file Supp_Fig2.pdf]

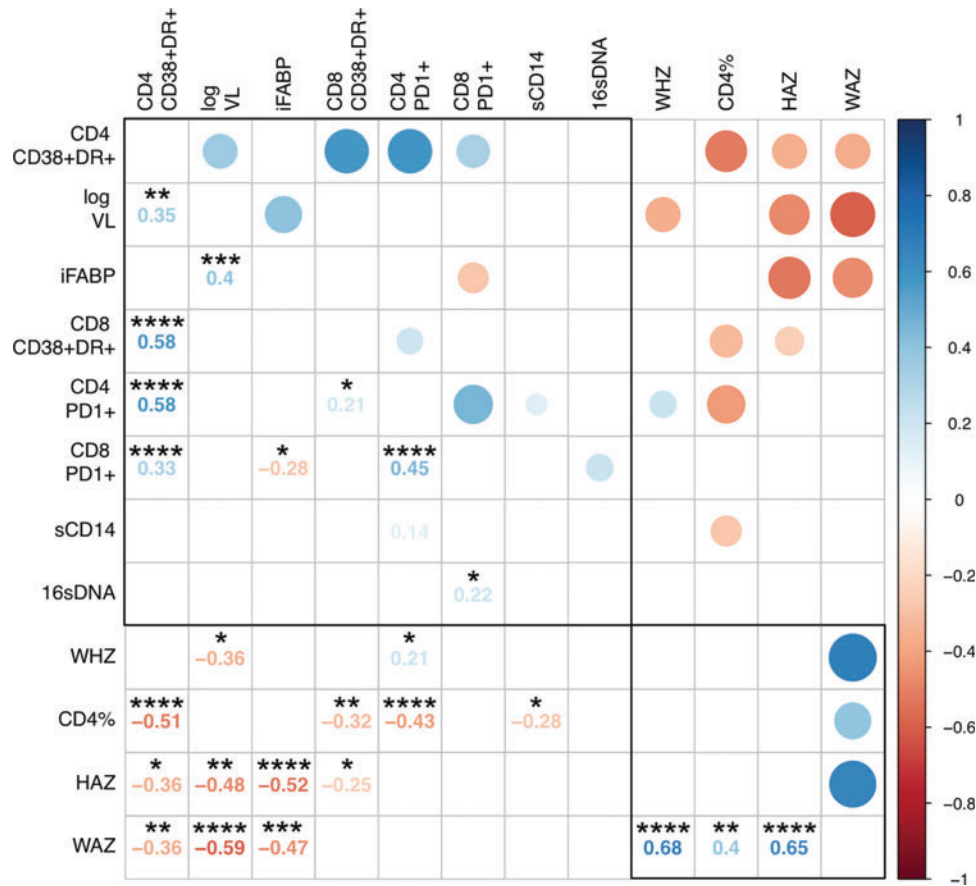

**SUPPLEMENTARY FIG. S2.** Associations between plasma biomarkers and immunological and clinical variables. Correlation matrix analogous to Figure 3, but only including HIV-positive children ( $n=73$ ). Positive correlations are indicated in *blue*, and inverse correlations are indicated in *red*. Darker color shades indicate higher  $r$ -values. In the *lower panel*  $r$ - and  $p$ -values are indicated based on Spearman's rank correlation tests ( $*p < .05$ ;  $**p < .01$ ;  $***p < .001$ ;  $****p < .0001$ ). Clustering of variables is based on principal component analysis using the R package *corrplot* and reveals two well-differentiated groups of parameters, one associated with disease (*upper left* quadrant) and the other associated with health (*lower right* quadrant).
